# Supplementary material
Source: publisher site journal article supplement (https://www.dovepress.com/article/254494)

Table S1. Clinical information of training set and validation sets

| Clinical characteristics                   | GSE32062<br>(N=260) | TCGA<br>(N=419) | GSE49997<br>(N=204) | GSE8842<br>(N=83) | GSE26712<br>(N=185) | GSE31245<br>(N=58) |
|--------------------------------------------|---------------------|-----------------|---------------------|-------------------|---------------------|--------------------|
| Age at diagnosis (mean±SD)                 | -                   | 59.49±11.46     | 57.66±11.82         | 51.28±13.35       | -                   | -                  |
| Clinical stage (I/II/III/IV/-)             | 0/0/204/56          | 0/23/331/62/3   | 0/9/154/31/10       | -                 | -                   | -                  |
| Neoplasm histologic grade (G1/G2/ G3/G4/-) | 0/131/129/0         | 1/52/357/1/8    | 0/50/143/0/11       | -                 | -                   | -                  |
| Tumor recurrence (Yes/No/-)                | 193/67              | 222/24/173      | 124/70/10           | 21/62             | -                   | -                  |
| Recurrence free survival time              | 26.87±22.99         | 18.21±13.03     | 19.06±11.22         | 76.69±41.69       | -                   | -                  |
| Death (Dead/Alive/-)                       | 121/139             | 233/185/1       | 57/137/10           | 15/66/2           | 129/24/32           | 24/34              |
| Overall survival days (mean±SD)            | 44.81±25.01         | 34.07±27.61     | 25.72±11.71         | 76.69±41.69       | 42.54±32.59         | 42.52±16.15        |

SD: Standard deviation

Table S2. Univariable and multivariate cox regression analysis for clinical factors

| Clinical factors                  | Univariable cox regression |                     | Multivariable cox regression |                    |
|-----------------------------------|----------------------------|---------------------|------------------------------|--------------------|
|                                   | <i>P</i> values            | HR(95%CI)           | <i>P</i> value               | HR (95%CI)         |
| Clinical stage (III/IV)           | 0.0132                     | 1.515 (1.088-2.109) | 0.0194                       | 1.49 (1.067-2.082) |
| Neoplasm histologic grade (G2/G3) | 0.329                      | 1.151 (0.868-1.527) | 0.5121                       | 1.10 (0.827-1.465) |

HR: Hazard ratio; CI: Confidence interval.

Table S3. The predict results of the pathway-based model in training sets and validation sets

| Datasets | Validation in PFS         |       |                        |                       | Validation in OS          |       |                        |                       |
|----------|---------------------------|-------|------------------------|-----------------------|---------------------------|-------|------------------------|-----------------------|
|          | LogRank<br><i>P</i> value | AUC   | High risk<br>(mean±SD) | Low risk<br>(mean±SD) | LogRank<br><i>P</i> value | AUC   | High risk<br>(mean±SD) | Low risk<br>(mean±SD) |
| GSE32062 | <0.001                    | 0.992 | 13.74±11.71            | 21.61±20.16           | 0.010                     | 0.918 | 38.82±26.58            | 45.74±23.39           |
| TCGA     | 0.030                     | 0.960 | 16.22±12.97            | 20.19±12.83           | 0.007                     | 0.932 | 34.29±26.38            | 39.70±27.74           |
| GSE8842  | 0.046                     | 0.909 | 68.29±40.07            | 85.11±42.07           | 0.227                     | 0.912 | 68.29±40.07            | 85.11±42.07           |
| GSE49997 | 0.002                     | 0.946 | 16.08±8.98             | 22.03±12.43           | 0.006                     | 0.943 | 23.52±10.82            | 27.93±12.20           |
| GSE26712 | -                         | -     | -                      | -                     | 0.012                     | 0.930 | 36.40±28.38            | 48.76±35.48           |
| GSE31245 | -                         | -     | -                      | -                     | 0.024                     | 0.848 | 38.89±16.05            | 46.14±15.70           |

SD: Standard deviation; PFS: Progression-free survival; OS: overall survival; AUC: Area under the curve.

Table S4. The predict results of the gene-based model in training sets and validation sets

| Datasets | Validation in PFS         |       |                          |                         | Validation in OS          |       |                          |                         |
|----------|---------------------------|-------|--------------------------|-------------------------|---------------------------|-------|--------------------------|-------------------------|
|          | LogRank<br><i>P</i> value | AUC   | High risk<br>(mean ± SD) | Low risk<br>(mean ± SD) | LogRank<br><i>P</i> value | AUC   | High risk<br>(mean ± SD) | Low risk<br>(mean ± SD) |
| GSE32062 | <0.001                    | 0.954 | 19.00±18.09              | 34.74±24.68             | <0.001                    | 0.943 | 41.71±25.29              | 47.92±24.41             |
| TCGA     | 0.039                     | 0.894 | 16.77±13.47              | 19.64±12.46             | 0.634                     | 0.856 | 36.61±27.96              | 37.39±26.43             |
| GSE8842  | 0.565                     | 0.675 | 74.9±43.81               | 78.49±39.93             | 0.297                     | 0.700 | 74.9±43.81               | 78.49±39.93             |
| GSE49997 | 0.002                     | 0.888 | 16.58±10.21              | 21.53±11.69             | 0.066                     | 0.882 | 23.65±12.12              | 27.79±10.96             |
| GSE26712 | -                         | -     | -                        | -                       | 0.353                     | 0.882 | 39.12±32.07              | 45.92±32.96             |
| GSE31245 | -                         | -     | -                        | -                       | 0.262                     | 0.704 | 40.69±15.43              | 44.34±16.91             |

SD: Standard deviation; PFS: Progression-free survival; OS: overall survival; AUC: Area under the curve.

Table S5. The predict results of comprehensive (pathways and clinical factor)-based model in training sets and validation sets

| Datasets | Validation in PFS         |       |                        |                       | Validation in OS          |       |                        |                       |
|----------|---------------------------|-------|------------------------|-----------------------|---------------------------|-------|------------------------|-----------------------|
|          | LogRank<br><i>P</i> value | AUC   | High risk<br>(mean±SD) | Low risk<br>(mean±SD) | LogRank<br><i>P</i> value | AUC   | High risk<br>(mean±SD) | Low risk<br>(mean±SD) |
| GSE32062 | <0.001                    | 0.918 | 20.09±19.26            | 33.68±24.44           | 0.001                     | 0.928 | 42.42±26.34            | 47.2±23.44            |
| TCGA     | 0.002                     | 0.902 | 16.21±12.86            | 20.20±12.94           | 0.030                     | 0.868 | 34.82±27.18            | 39.73±26.96           |
| GSE4997  | <0.001                    | 0.898 | 15.76±8.49             | 22.35±12.61           | 0.005                     | 0.898 | 23.23±10.77            | 28.02±12.18           |

SD: Standard deviation; PFS: Progression-free survival; OS: overall survival; AUC: Area under the curve.

**Supplemental Figure S1** Kaplan-Meier survival analysis and Receiver Operating Characteristic (ROC) curves for the pathway model.

(A) Kaplan-Meier survival curves and (B) ROC curves of progression-free survival (PFS). (C) Kaplan-Meier survival curves and (D) ROC curves of overall survival (OS). The abscissa represents sensitivity and the ordinate represents specificity.

**Supplemental Figure S2** Kaplan-Meier survival analysis and Receiver Operating Characteristic (ROC) curves for the gene model.

(A) Kaplan-Meier survival curves and (B) ROC curves of progression-free survival (PFS). (C) Kaplan-Meier survival curves and (D) ROC curves of overall survival (OS). The abscissa represents sensitivity and the ordinate represents specificity.

**A**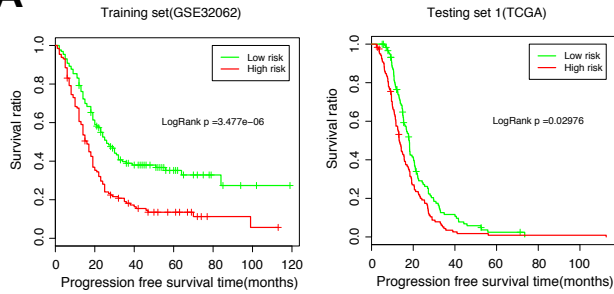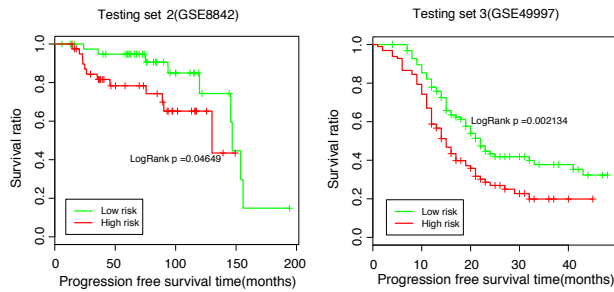**B**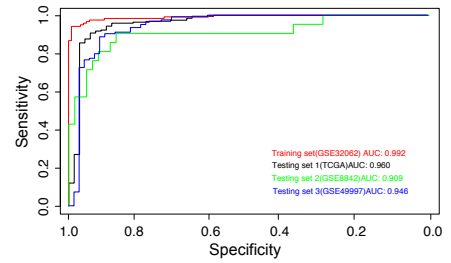**D**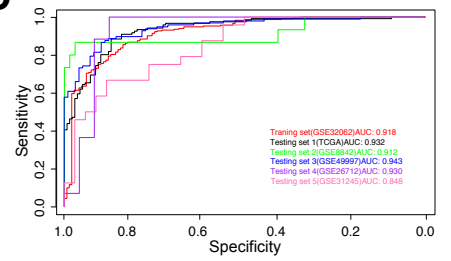**C**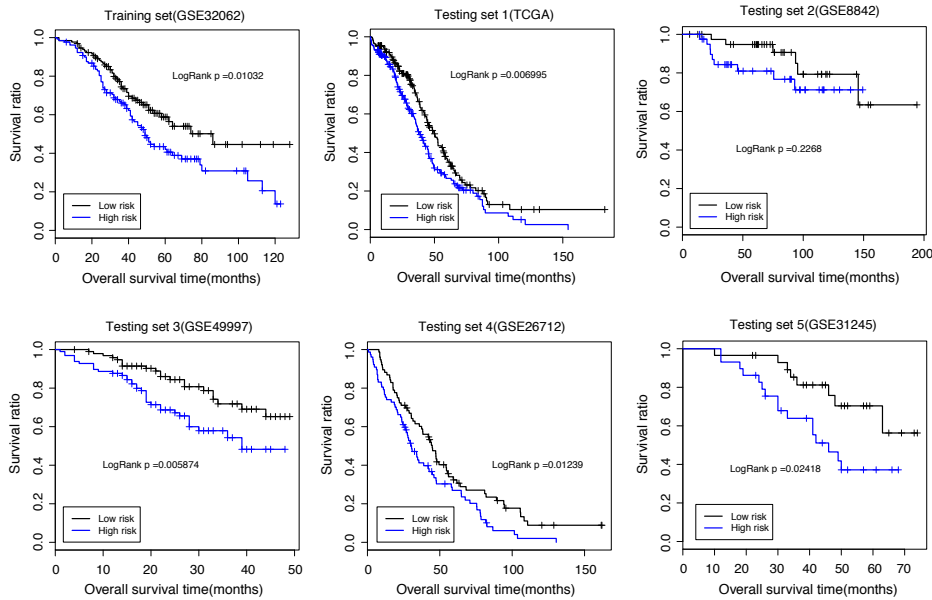

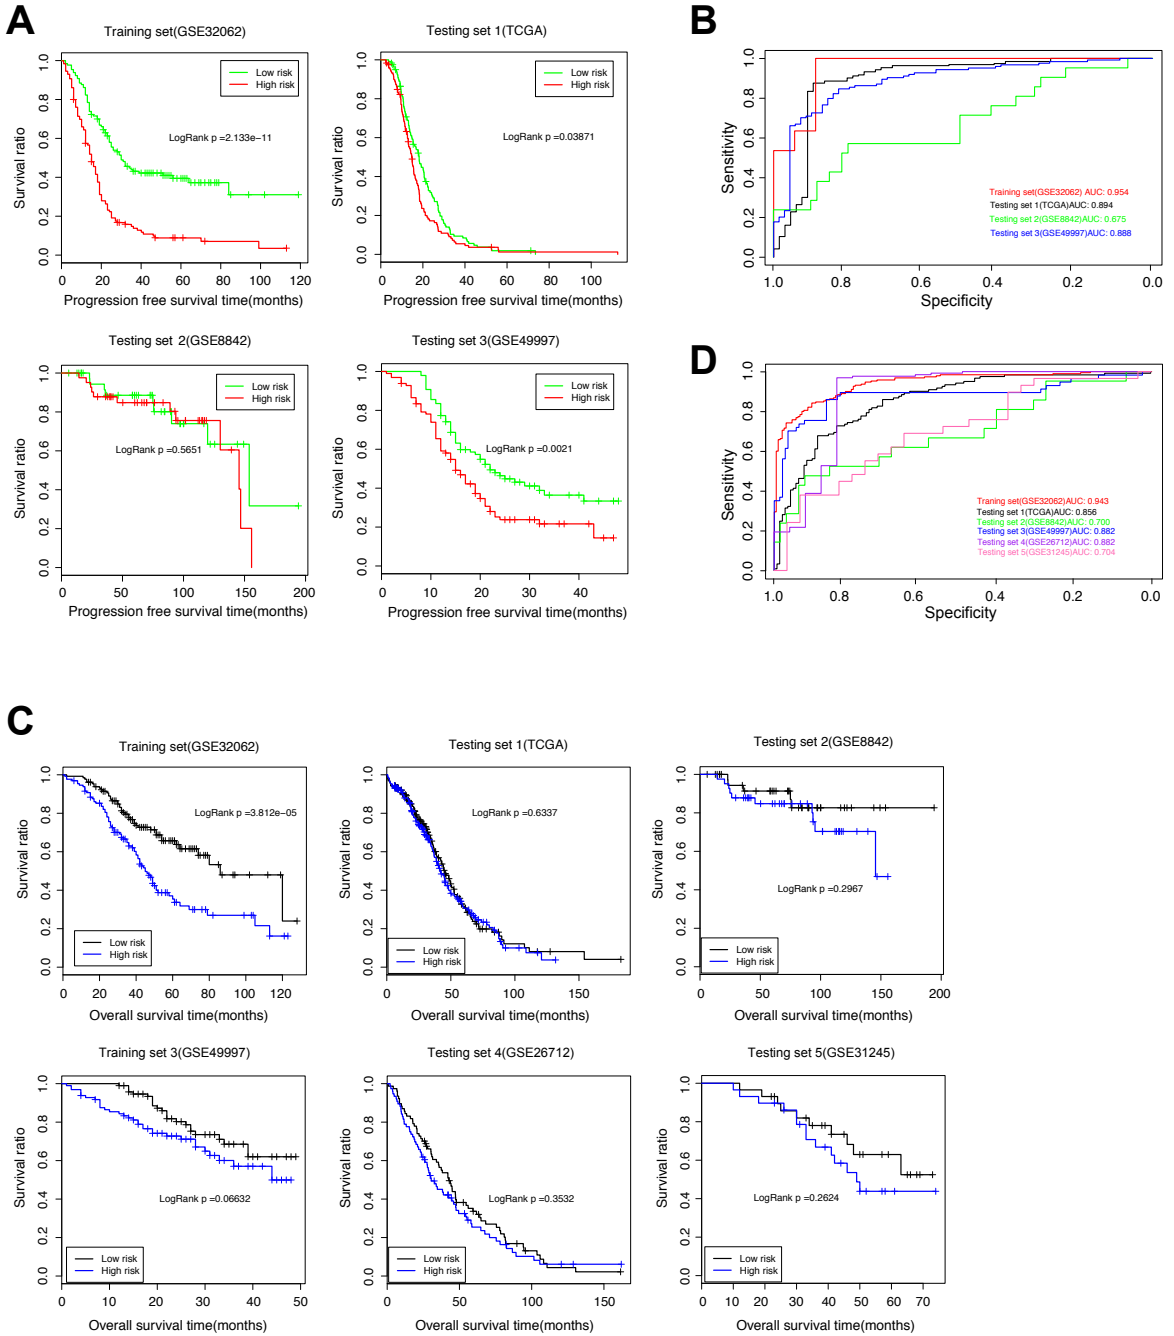

Supplement: Supplementary file 1 [file get_supplementary_file.php]
